## CORRECTION

# Correction: Passive water collection with the integument: mechanisms and their biomimetic potential (doi:10.1242/jeb.153130)

**Philipp Comanns**

There was an error published in *J. Exp. Biol.* (2018) **221**, jeb153130 (doi:10.1242/jeb.153130).

The corresponding author's email address was incorrect. It should be Philipp.Comanns@rwth-aachen.de. This has been corrected in the online full-text and PDF versions.

We apologise to authors and readers for any inconvenience this may have caused.
